# Supplementary material
Source: Research Square preprint supplement (doi:10.21203/rs.3.rs-10056069/v1)

**Graphical Abstract**


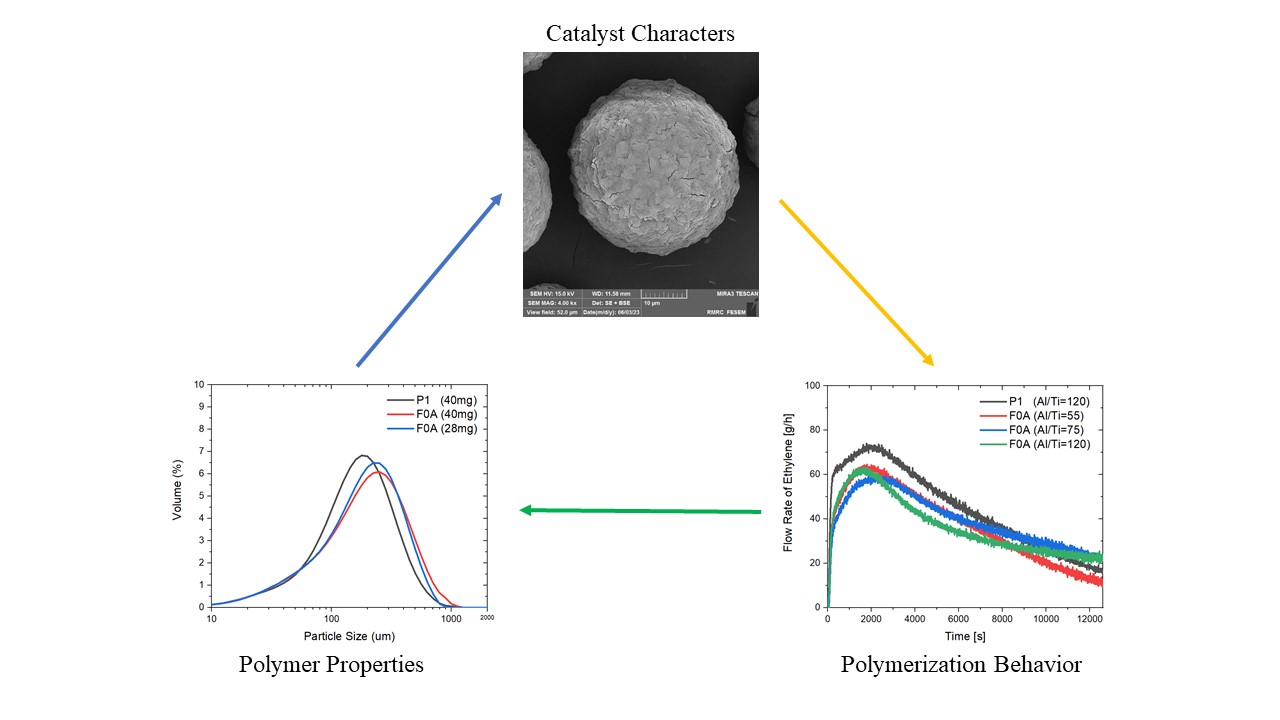

Supplement: Supplementary file 1 [file deb68fab113ce8339f5e0a2a.docx]
